# Supplementary material
Source: PubMed Central journal article supplement (PMC6858542)
Supplement: NIHMS1537602-supplement-2.pdf [file NIHMS1537602-supplement-2.pdf]

## SUPPLEMENTARY TABLES

- p.2 **Supplementary Table 1.** Detailed clinical features of the six affected individuals.
- p.4 **Supplementary Table 2.** Metrics of trio-based whole-exome sequencing (WES) experiments.
- p.5 **Supplementary Table 3.** De novo candidates after ES in 3 subjects
- p.8 **Supplementary Table 4.** Amplicons used for *RHOA* ultra-deep sequencing.
- p.9 **Supplementary Table 5.** Summary of *RHOA* ultra-deep sequencing.
- p.10 **Supplementary Table 6.** Mutant allele fraction of the two *RHOA* mutations in all tested samples.
- p.11 **Supplementary Table 7.** *RHOA* mutations, frequency in public variant databases, and *in silico* predictions.
- p.12 **Supplementary Table 8.** Phenotype of patients with hypomelanosis of Ito in the M.U.S.T.A.R.D. cohort.
- p.15 **Supplementary Table 9.** Summary of the most frequent somatic mutations of *RHOA* reported in cancer.
- p.16 **Supplementary Table 10. Primers used for mutagenesis.**
- p.17 **SUPPLEMENTARY REFERENCES**

**Supplementary Table 1.** Detailed clinical features of the six affected individuals.

|                                | Subject 1                                                                                                                            | Subject 2                                                                                                                                                                                                                                             | Subject 3                                                                                                                      | Subject 4                                                                                                       | Subject 5                                                                                                                               | Subject 6                                                            | Subject 7                                                                                        |
|--------------------------------|--------------------------------------------------------------------------------------------------------------------------------------|-------------------------------------------------------------------------------------------------------------------------------------------------------------------------------------------------------------------------------------------------------|--------------------------------------------------------------------------------------------------------------------------------|-----------------------------------------------------------------------------------------------------------------|-----------------------------------------------------------------------------------------------------------------------------------------|----------------------------------------------------------------------|--------------------------------------------------------------------------------------------------|
| <b>RHOA change</b>             | c.139G>A p.(Glu47Lys)                                                                                                                | c.139G>A p.(Glu47Lys)                                                                                                                                                                                                                                 | c. 211C>T p.(Pro71Ser)                                                                                                         | c.139G>A p.(Glu47Lys)                                                                                           | c.139G>A p.(Glu47Lys)                                                                                                                   | No mutation found (DNA not analyzable due to failed quality control) | c.139G>A p.(Glu47Lys)                                                                            |
| <b>Sex</b>                     | Female                                                                                                                               | Male                                                                                                                                                                                                                                                  | Female                                                                                                                         | Female                                                                                                          | Female                                                                                                                                  | Female                                                               | Female                                                                                           |
| <b>Age (age at last visit)</b> | 18 years (15 years)                                                                                                                  | 28 years (25 years)                                                                                                                                                                                                                                   | 14 years (10 years)                                                                                                            | 6 years (3 years)                                                                                               | 16 years (15 years)                                                                                                                     | 9 years (10 years)                                                   | 2 years (2 years)                                                                                |
| <b>Skin anomalies</b>          | Linear hypopigmentation<br>Patchy scalp hair scarring alopecia.                                                                      | Linear hypopigmentation on neck and upper and lower limbs with pilar dysplasia. Patchy scalp hair scarring alopecia.                                                                                                                                  | Linear hypopigmentation on neck and upper and lower limbs with pilar dysplasia.                                                | Linear hypopigmentation on upper and lower limbs.                                                               | Linear hypopigmentation on upper and lower limbs<br>Patchy scalp hair scarring alopecia (right occiput and left frontoparietal regions) | Linear hypopigmentation on limbs                                     | Linear hypopigmentation on upper and lower limbs<br>Alopecia not reported                        |
| <b>Facial dysmorphism</b>      | Facial asymmetry. Marked malar hypoplasia with retrognathic maxilla and malocclusion. Broad nasal bridge with thick alae nasi.       | Facial asymmetry with left malar hypoplasia. Broad nasal bridge with thick alae nasi. Short philtrum.                                                                                                                                                 | Facial asymmetry with malar hypoplasia, microtia, and narrower palpebral fissure on the left side. Thick alae nasi. Cleft lip. | Facial asymmetry with left microsomia, left deviation of the maxilla and the mandible, and soft tissue atrophy. | Right malar hypoplasia and moderate right hemifacial microsomia.                                                                        | Left hemifacial microsomia                                           | Right malar hypoplasia<br>Moderate right hemifacial microsomia, broad nasal bridge               |
| <b>Acral anomalies</b>         | Asymmetrical III, IV, V toes.                                                                                                        | Bilateral brachydactyly. Bilateral short II, III, IV, and V toes Broad first toes.                                                                                                                                                                    | Left foot postaxial polydactyly. Left III-IV syndactyly                                                                        | Brachydactyly of the right third toe                                                                            | Bilateral clinodactyly of second toes.                                                                                                  | Bilateral brachydactyly of third toes.                               | Bilateral clinodactyly, brachydactyly, broad toes, sandal gap.                                   |
| <b>Teeth anomalies</b>         | Conical teeth, oligodontia and microdontia of deciduous and permanent teeth. Persistent decidual dentition. Linear enamel dysplasia. | Conical teeth, oligodontia and microdontia of deciduous and permanent teeth.                                                                                                                                                                          | Agenesis of twelve tooth: two on the right, six on the left, and the four third molars.                                        | Infraocclusion and conical teeth.                                                                               | Multiple right dental agenesis                                                                                                          | Multiple dental agenesis and bilateral microdontia.                  | Premature eruption of right teeth                                                                |
| <b>Ocular anomalies</b>        | Right peripapillary chorioretinal atrophy, high-degree myopia, and strabismus.                                                       | Bilateral congenital nystagmus, myopia, astigmatism, asymmetric posterior capsular cataract. Right eye visual acuity: 20/100; Left: hand motion. Normal cornea, corectopia, bilateral pale fundus with diffuse retinal atrophy, papillary dysversion. | Strabismus. No microphthalmia on CT-scan.                                                                                      | Left microphthalmia Atrophy of the left optical nerve (visual evoked potentials) and oculomotor dyssynergia.    | Normal examination (visual acuity, visual evoked potentials, fundus ophthalmoscopy, and slit lamp examination).                         | Myopia. Normal ophthalmoscopy.                                       | Right congenital cataracts<br>Right congenital glaucoma<br>Bilateral retinal dystrophy<br>Myopia |
| <b>Brain anomalies</b>         | Non-progressive cystic leukoencephalopathy.                                                                                          | Leukoencephalopathy. Posterior fossa arachnoid cyst.                                                                                                                                                                                                  | No brain MRI available. Enlarged lateral ventricle with no calcifications on CT-scan                                           | Leukoencephalopathy with enlarged perivascular spaces. Posterior fossa arachnoid                                | Bilateral white matter anomalies predominating in the right hemisphere CT-scan: no calcifications                                       | No MRI available                                                     | Normal MRI and CT at 6 weeks                                                                     |

|                       |                                   |                                                                                                             |                                                                             |                                                                                                          |                                   |                                   |                                                                                       |
|-----------------------|-----------------------------------|-------------------------------------------------------------------------------------------------------------|-----------------------------------------------------------------------------|----------------------------------------------------------------------------------------------------------|-----------------------------------|-----------------------------------|---------------------------------------------------------------------------------------|
|                       |                                   |                                                                                                             |                                                                             | cyst vs. mega cisterna magna. Small calcifications in the basal ganglia, especially putamen, on CT-scan. |                                   |                                   |                                                                                       |
| <b>Other features</b> | NR                                | Asymmetrical hearing loss (left: 70% loss; right: normal), consecutive to an abnormal cochlear development. | Scoliosis, inequality of the lower limbs<br>Bilateral vesicoureteral reflux | NR                                                                                                       | Sigmoid and rectal atresia        | NR                                | Bilateral hearing loss<br>Inequality of the lower limbs: right leg > Left leg by 3 cm |
| <b>Intelligence</b>   | Normal development and intellect. | Normal development and intellect.                                                                           | Normal development and intellect.                                           | Normal development and intellect.                                                                        | Normal development and intellect. | Normal development and intellect. | Normal development and intellect.                                                     |

Abbreviations: CT-scan: Computerized tomography scan; MRI: Magnetic resonance imaging.

**Supplementary Table 2.** Metrics of trio-based whole-exome sequencing (WES) experiments.

| Subject   | Tissue                   | Mapped sequences <sup>a</sup> | Mean sequencing depth <sup>b</sup> | Percent target $\geq$ 10X <sup>b</sup> | Percent target $\geq$ 100X <sup>b</sup> |
|-----------|--------------------------|-------------------------------|------------------------------------|----------------------------------------|-----------------------------------------|
| S1        | Fresh skin               | 5.5                           | 160.3                              | 94.6                                   | 68.1                                    |
| Father S1 | Blood                    | 2.4                           | 70.4                               | 92.4                                   | 24.7                                    |
| Mother S1 | Blood                    | 4.1                           | 119.4                              | 94.2                                   | 55.1                                    |
| S2        | Fibroblasts <sup>c</sup> | 6.5                           | 187.1                              | 95.0                                   | 74.1                                    |
| Father S2 | Blood                    | 4.5                           | 130.4                              | 94.4                                   | 59.2                                    |
| Mother S2 | Blood                    | 3.9                           | 113.3                              | 94.0                                   | 52.4                                    |
| S3        | Fresh skin               | 5.8                           | 169.3                              | 95.8                                   | 71.9                                    |
| Father S3 | Blood                    | 2.4                           | 70.5                               | 94.3                                   | 23.0                                    |
| Mother S3 | Blood                    | 2.2                           | 65.0                               | 93.9                                   | 17.9                                    |

<sup>a</sup>In gigabases. <sup>b</sup>Based on RefSeq coding exons and splice junctions. Depth-of-coverage metrics were calculated with the Genome Analysis Toolkit (GATK)<sup>1</sup> DepthofCoverage tool using reads with mapping quality  $\geq$  20 and bases with base quality  $\geq$  30. <sup>c</sup>Cultured skin fibroblasts.

**Supplementary Table 3.** De novo candidates after WES in 3 subjects.

| Individual | Gene           | gene accessions     | gDNA change (hg19)                              | cDNA change                       | Amino acid change    | Allelic Balance   | ExAC (Allele count - Allele frequency)                  | gnomAD (Allele count - Allele frequency)                 | OMIM                                                  |
|------------|----------------|---------------------|-------------------------------------------------|-----------------------------------|----------------------|-------------------|---------------------------------------------------------|----------------------------------------------------------|-------------------------------------------------------|
| S1         | <i>RHOA</i>    | NM_001664.2         | chr3:g.49412884C>T                              | c.139G>A                          | p.(Glu47Lys)         | AD=140,44;AB=0.31 | none                                                    | none                                                     | non OMIM                                              |
|            | <i>ANKRD36</i> | NM_001164315.       | chr2:g.97827852C>T                              | c.1406C>T                         | p.(Pro469Leu)        | AD=43,6;AB=0.12   | 263 - 0.01526                                           | 743 - 0.005736                                           | non OMIM                                              |
|            | <i>MDC1</i>    | NM_014641.2         | chr6:g.30681077_30681081delGAAGG                | c.638_642delCC TTC                | p.(Ala213Glufs*5)    | AD=26,10;AB=0.28  | 207 - 0.00182                                           | 560 - 0.002110                                           | non OMIM                                              |
|            |                |                     | chr6:g.30681083_30681101delAAAAGGCGGCC CAAGGCCG | c.618_636delCG GCCTTGGGCC GCCTTTT | p.(Gly207Profs*4)    | AD=24,9;AB=0.27   | 206 - 0.001848                                          | 560 - 0.002135                                           | non OMIM                                              |
|            | <i>SNAP29</i>  | NM_004782.3         | chr22:g.21224808C>A                             | c.421C>A                          | p.(Gln141Lys)        | AD=16,4;AB=0.20   | none                                                    | none - 1 variant affecting the same AA (1 - 0,000004070) | MIM609528 - unrelated phenotype - autosomal recessive |
|            | <i>BIK</i>     | NM_001197.4         | chr22:g.43525234_43525235insTGCTGCTGGC GCTGCTGC | c.406_407insTG CTGCTGGCGCT GCTGC  | p.(Leu143_Leu148dup) | AD=7,4;AB=0.36    | 738 - 0.006323                                          | 74 - 0.0002769                                           | non OMIM                                              |
|            | <i>RHOA</i>    | NM_001664.2         | chr3:g.49412884C>T                              | c.139G>A                          | p.(Glu47Lys)         | AD=6/222;AB=2.6   | none                                                    | none                                                     | non OMIM                                              |
| <i>PML</i> | NM_002675.3    | chr15:g.74290351C>T | c.136C>T                                        | p.(Pro46Ser)                      | AD=15,15;AB=0.50     | none              | none                                                    | MIM102578 - unrelated phenotype                          |                                                       |
| S2         | <i>ISLR2</i>   | NM_001130136.1      | chr15:g.74425772C>A                             | c.677C>A                          | p.(Pro226His)        | AD=24,6;AB=0.20   | none                                                    | none                                                     | non OMIM                                              |
|            | <i>TSHZ3</i>   | NM_020856.2         | chr19:g.31768792G>A                             | c.1907C>T                         | p.(Ser636Phe)        | AD=99,17;AB=0.15  | none                                                    | none                                                     | non OMIM                                              |
|            | <i>RASSF2</i>  | NM_014737.2         | chr20:g.4771164G>A                              | c.470C>T                          | p.(Thr157Met)        | AD=58,46;AB=0.44  | 9 - 0.00007673                                          | 10 - 0.00004665                                          | non OMIM                                              |
|            | <i>AKAP4</i>   | NM_003886.2         | chrX:g.49957329C>T                              | c.2035G>A                         | p.(Glu679Lys)        | AD=203,26;AB=0.11 | none - 1 variant affecting the same AA (1 - 0.00001143) | none - 1 variant affecting the same AA (7 - 0.00003931)  | non OMIM                                              |
|            | <i>EDA2R</i>   | NM_001199687.2      | chrX:g.65824274G>A                              | c.341C>T                          | p.(Ser114Phe)        | AD=117,14;AB=0.11 | none - 1 variant affecting the same AA (1 - 0.00001173) | none - 1 variant affecting the same AA (1 - 0,000005698) | non OMIM                                              |
|            | <i>PLXNB3</i>  | NM_001163257.1      | chrX:g.153032499C>T                             | c.286C>T                          | p.(Arg96Cys)         | AD=133,18;AB=0.12 | 1 - 0.00001187                                          | 5 - 0,00002828                                           | non OMIM                                              |
|            | S3             | <i>RHOA</i>         | NM_001664.2                                     | chr3:g.49405927G>A                | c.211C>T             | p.(Pro71Ser)      | AD=87:28;AB=0.24                                        | none                                                     | none                                                  |

|               |                |                                                                                                                                                  |                                                                                                                                            |                      |                   |                    |                        |                                                                   |
|---------------|----------------|--------------------------------------------------------------------------------------------------------------------------------------------------|--------------------------------------------------------------------------------------------------------------------------------------------|----------------------|-------------------|--------------------|------------------------|-------------------------------------------------------------------|
| <i>NBPF10</i> | NM_001039703.5 | chr1:g.145297661C>A                                                                                                                              | c.536C>A                                                                                                                                   | p.(Ala179Asp)        | AD=39:6;AB=0.13   | 12 -<br>0.00009978 | 1421 -<br>0.005642     | non OMIM                                                          |
| <i>LOR</i>    | NM_000427.2    | chr1:g.153233747_153233836delGGGGGCGGC<br>TCCGGCTGCTTCTCCT<br>CCGGTGGCGGGCGGCT<br>CCTCCGGGGGCGGCT<br>CCGGCTGCTTCTCCA<br>GCGGTGGGGGCGGCT<br>CCTCC | c.322_411delGG<br>GGGCGGCTCC<br>GGCTGCTTCTC<br>CTCCGGTGGC<br>GGCGGCTCCT<br>CCGGGGGCGG<br>CTCCGGCTGCT<br>TCTCCAGCGGT<br>GGGGGCGGCT<br>CCTCC | p.(Ser121_Gly150del) | AD=26:6;AB=0.19   | none               | 2 -<br>0.00007407      | MIM604117<br>- unrelated<br>phenotype                             |
| <i>CAB39</i>  | NM_001130849.1 | chr2:g.231678762_231678763delAG                                                                                                                  | c.628-2_628-1delAG                                                                                                                         | intronic             | AD=29:4;AB=0.12   | 37 -<br>0.0003182  | 98 -<br>0.0004175      | non OMIM                                                          |
| <i>FRG1</i>   | NM_004477.2    | chr4:g.190883039T>C                                                                                                                              | c.692T>C                                                                                                                                   | p.(Leu231Pro)        | AD=161:18;AB=0.10 | none               | 4 -<br>0.0001317       | non OMIM                                                          |
| <i>POLR3B</i> | NM_001160708.1 | chr12:g.106820973delA                                                                                                                            | c.928-2delA                                                                                                                                | intronic             | AD=79:19;AB=0.19  | none               | 10 -<br>0.00005319     | MIM614381<br>- unrelated<br>phenotype -<br>autosomal<br>recessive |
| <i>SETD8</i>  | NM_020382.3    | chr12:g.123880924_123880925delTT                                                                                                                 | c.542_543delTT                                                                                                                             | p.(Leu181Hisfs*20)   | AD=44:7;AB=0.14   | none               | none                   | non OMIM                                                          |
| <i>TSC2</i>   | NM_000548.3    | chr16:g.2137925_2137958delCCCTGCAGTGCA<br>GGAAAGGTAGGGCCG<br>GGTGGGG                                                                             | c.5051_5068+16<br>delCCCTGCAGT<br>GCAGGAAAGG<br>TAGGGCCGGG<br>TGGGG                                                                        | intronic             | AD=17:20;AB=0.54  | 270 -<br>0.002265  | 571 -<br>0.002071      | MIM613254<br>- unrelated<br>phenotype                             |
| <i>EPG5</i>   | NM_020964.2    | chr18:g.43460190T>C                                                                                                                              | c.5519-2A>G                                                                                                                                | intronic             | AD=42:36;AB=0.46  | none               | 1 -<br>0.00000457<br>8 | MIM242840<br>- unrelated<br>phenotype -<br>autosomal<br>recessive |
| <i>VCX</i>    | NM_013452.2    | chrX:g.7811958_7812017delGAGTCAGGAGAG<br>CGAGATGGAAGAACC<br>ACTGAGTCAGGAGAG<br>CCAGGTGGAGGAACC<br>ACC                                            | c.522_581delGA<br>GTCAGGAGAG<br>CGAGATGGAA<br>GAACCACTGAG<br>TCAGGAGAGC<br>CAGGTGGAGG<br>AACCACC                                           | p.(Pro183_Glu202del) | AD=84:39;AB=0.32  | 514 -<br>0.006246  | 439 -<br>0.002395      | non OMIM                                                          |

Candidate de novo mutational events were identified by focusing on protein-altering and splice-site changes as follows: (1) supported by at least three reads and 10% of total reads in the proband; (2) absent in both parents, as defined by variant reads representing less than 5% of total reads; (3) at base-pair positions covered by at least four reads in the entire trio; and (4) present at a frequency less than 1% in dbSNP (build 147) and 0.1% in the Exome Aggregation Consortium (ExAC). *RHOA* was the only candidate gene mutated in all three subjects, and no variants in other genes were found in more than one subject. Most candidate genes were rejected because on the high frequency of variants in public databases (*ANKRD36*, *BIK*, *CAB39*, *NBPF10*, *MDC1*, *RASSF2*, *TSC2*, *VCX*), their previous involvement in either unrelated autosomal recessive

(*EPG5*, *POLR3B*, *SNAP29*) or dominant (*LOR*) phenotypes, or their tolerance to variants in public databases (*AKAP4*, *FRG1*, *ISLR2*, *PLXNB3*, *TSHZ3*). *EDA2R* encodes a receptor for an isoform of ectodysplasin, mutated in hypohidrotic ectodermal dysplasia. However, the reference *EDA2R* sequence includes a high number of missense variants according to ExAC ( $z = -1,63$ ). *SETD8*, a gene intolerant to loss-of-function variants in ExAC ( $pLI = 0.95$ ), was found mutated in one subject only, and no evidence was found in the literature for its involvement in the observed phenotype.

**Supplementary Table 4.** Amplicons used for *RHOA* ultra-deep sequencing.

| Amplicon | Sequence                                                             | Chromosomal coordinates <sup>a</sup> | Amplicon size |
|----------|----------------------------------------------------------------------|--------------------------------------|---------------|
| Exon 2   | Forward: GATTGCAGAATGTCTACCCAAAC<br>Reverse: ATATGCTAAGGACACCATGTCAA | chr3:49412185-49414215               | 2,031 bp      |
| Exon 3   | Forward: GAGCTTGATGCTCATAAAAGTGA<br>Reverse: CTACAATCCCAAACCTCCAGGAC | chr3:49405714-49406784               | 1,071 bp      |
| Exon 4-5 | Forward: TTGTGTTGTGGATCTTTTGCTC<br>Reverse: GAGACAGGTTATGCCATCTTCC   | chr3:49396766-49400342               | 3,577 bp      |

Abbreviations: bp: base pair. <sup>a</sup>Based on the human genome reference sequence GRCh37/hg19. *RHOA* RefSeq accession number: NM\_001664.2. Exon 1 is non coding.

**Supplementary Table 5.** Summary of *RHOA* ultra-deep sequencing.

| Individual | Tissue                       | Target           | Mapped sequences <sup>c</sup> | Mean sequencing depth <sup>d</sup> | Percent target $\geq$ 1000X <sup>d</sup> |
|------------|------------------------------|------------------|-------------------------------|------------------------------------|------------------------------------------|
| S1         | Fresh skin                   | Exon 2           | 12.9                          | 80,873                             | 100                                      |
|            | Fibroblasts (A) <sup>a</sup> | Exon 2           | 9.1                           | 56,693                             | 100                                      |
|            | Fibroblasts (N) <sup>b</sup> | Exon 2           | 1.6                           | 10,336                             | 100                                      |
|            | Fibroblasts (N) <sup>b</sup> | Exon 2           | 9.3                           | 58,155                             | 100                                      |
|            | Blood                        | Exon 2           | 9.0                           | 56,261                             | 100                                      |
| Father S1  | Blood                        | Exon 2           | 9.0                           | 55,971                             | 100                                      |
| Mother S1  | Blood                        | Exon 2           | 7.5                           | 46,805                             | 100                                      |
| S2         | Fresh skin                   | Exon 2           | 4.7                           | 29,564                             | 100                                      |
|            | Fibroblasts (A) <sup>a</sup> | Exon 2           | 4.1                           | 25,954                             | 100                                      |
|            | Blood                        | Exon 2           | 8.2                           | 51,099                             | 100                                      |
| Mother S2  | Blood                        | Exon 2           | 9.5                           | 59,360                             | 100                                      |
| Father S2  | Blood                        | Exon 2           | 7.8                           | 48,453                             | 100                                      |
| S3         | Fresh skin                   | Exon 3           | 1.4                           | 11,482                             | 100                                      |
|            | Blood                        | Exon 3           | 1.2                           | 9,292                              | 100                                      |
| Mother S3  | Blood                        | Exon 3           | 1.0                           | 8,291                              | 100                                      |
| Father S3  | Blood                        | Exon 2           | 1.5                           | 11,871                             | 100                                      |
| S4         | Fresh Skin                   | Exon 2           | 1.7                           | 10,590                             | 100                                      |
|            | Blood                        | Exon 2           | 1.4                           | 8,506                              | 100                                      |
| S5         | Fresh Skin                   | Exon 2           | 2.4                           | 14,739                             | 100                                      |
|            | Blood                        | Exon 2           | 2.0                           | 12,225                             | 100                                      |
| S6         | Fresh Skin                   | All coding exons | 1.5                           | 2,439                              | 100                                      |

<sup>a</sup>Cultured skin fibroblasts derived from a biopsy of an affected (hypopigmented) skin lesion. <sup>b</sup>Cultured skin fibroblasts derived from a biopsy in normal skin. <sup>c</sup>In megabases. <sup>d</sup>Based on targeted coding bases and splice junctions. Depth-of-coverage metrics were calculated with the GATK DepthofCoverage tool using reads with mapping quality  $\geq$  20 and bases with base quality  $\geq$  30. *RHOA* RefSeq accession number: NM\_001664.2.

**Supplementary Table 6.** Mutant allele fraction of the two *RHOA* mutations in all tested samples.

| Individual                                               | Tissue                       | Sequencing method | Alternative allele count <sup>c</sup> | Total reads count <sup>c</sup> | Mutant allele fraction <sup>c</sup> |
|----------------------------------------------------------|------------------------------|-------------------|---------------------------------------|--------------------------------|-------------------------------------|
| <i>chr3:g.49412884C&gt;T (c.139G&gt;A; p.(Glu47Lys))</i> |                              |                   |                                       |                                |                                     |
| S1                                                       | Fresh skin                   | WES               | 44                                    | 144                            | 30.6                                |
|                                                          |                              | Targeted          | 30,761                                | 91,492                         | 33.5                                |
|                                                          | Fibroblasts (A) <sup>a</sup> | Targeted          | 11,534                                | 63,041                         | 18.3                                |
|                                                          | Fibroblasts (N) <sup>b</sup> | Targeted          | 1,632                                 | 11,924                         | 13.7                                |
|                                                          | Fibroblasts (N) <sup>b</sup> | Targeted          | 1,186                                 | 63,208                         | 1.9                                 |
| Father S1                                                | Blood                        | Targeted          | 56                                    | 58,126                         | 0.1                                 |
|                                                          |                              | WES               | 0                                     | 89                             | 0                                   |
| Mother S1                                                | Blood                        | Targeted          | 44                                    | 60,811                         | <0.1                                |
|                                                          |                              | ES                | 0                                     | 173                            | 0                                   |
| S2                                                       | Fibroblasts                  | Targeted          | 57                                    | 49,274                         | 0.1                                 |
|                                                          |                              | WES               | 6                                     | 228                            | 2.6                                 |
|                                                          | Fresh skin                   | Targeted          | 776                                   | 28,774                         | 2.7                                 |
|                                                          |                              | Targeted          | 7,729                                 | 33,501                         | 23.1                                |
| Father S2                                                | Blood                        | Targeted          | 115                                   | 56,144                         | 0.2                                 |
|                                                          |                              | WES               | 0                                     | 170                            | 0                                   |
| Mother S2                                                | Blood                        | Targeted          | 31                                    | 51,869                         | 0                                   |
|                                                          |                              | WES               | 0                                     | 123                            | 0                                   |
| S4                                                       | Fresh skin                   | Targeted          | 32                                    | 64,442                         | 0.1                                 |
|                                                          |                              | Targeted          | 2,939                                 | 9,733                          | 30.2                                |
| S5                                                       | Blood                        | Targeted          | 4                                     | 7,674                          | 0.1                                 |
|                                                          |                              | Targeted          | 3,103                                 | 15,639                         | 19.8                                |
| S5                                                       | Blood                        | Targeted          | 5                                     | 11,261                         | 0.1                                 |
|                                                          |                              | Targeted          | 5                                     | 11,261                         | 0.1                                 |
| <i>chr3:g.49405927G&gt;A (c.211C&gt;T; p.(Pro71Ser))</i> |                              |                   |                                       |                                |                                     |
| S3                                                       | Fresh skin                   | WES               | 28                                    | 115                            | 24.3                                |
|                                                          |                              | Targeted          | 3,381                                 | 11,651                         | 29                                  |
|                                                          | Blood                        | Targeted          | 7                                     | 9,305                          | 0.1                                 |
| Father S3                                                | Blood                        | WES               | 0                                     | 79                             | 0                                   |
|                                                          |                              | Targeted          | 10                                    | 11,774                         | 0.1                                 |
| Mother S3                                                | Blood                        | WES               | 0                                     | 60                             | 0                                   |
|                                                          |                              | Targeted          | 1                                     | 8,353                          | <0.1                                |

Abbreviations: WES: whole exome sequencing. Targeted: targeted ultra-deep sequencing of *RHOA*.  
<sup>a</sup>Cultured skin fibroblasts derived from a biopsy of an affected (hypopigmented) skin lesion. <sup>b</sup>Cultured skin fibroblasts derived from a biopsy in normal skin. <sup>c</sup>Only bases with base quality  $\geq 30$  were considered.

**Supplementary Table 7.** *RHOA* mutations, frequency in public variant databases, and *in silico* predictions.

| <i>RHOA</i> variant <sup>a</sup>             | dbSNP<br>(build147) | COSMIC <sup>b</sup> | ExAC <sup>c</sup>                          | gnomAD <sup>c</sup>                     | GERP<br>score | CADD<br>score | PolyPhen-2<br>HumVar score <sup>d</sup> | SIFT<br>score       |
|----------------------------------------------|---------------------|---------------------|--------------------------------------------|-----------------------------------------|---------------|---------------|-----------------------------------------|---------------------|
| chr3:g.49412884C>T<br>c.139G>A<br>p.Glu47Lys | Absent              | Absent              | None<br>(~120,900<br>alleles<br>sequenced) | None (~252,400<br>alleles<br>sequenced) | 5.9           | 35.0          | 0.855<br>(possibly<br>damaging)         | 0.010<br>(damaging) |
| chr3:g.49405927G>A<br>c.211C>T<br>p.Pro71Ser | Absent              | Absent              | None<br>(~121,400<br>alleles<br>sequenced) | None (~248,700<br>alleles<br>sequenced) | 5.8           | 33.0          | 0.516 (possibly<br>damaging)            | 0.002<br>(damaging) |

Abbreviations: COSMIC: Catalogue of Somatic Mutations in Cancer<sup>2</sup>; ExAC: Exome Aggregation Consortium<sup>3</sup>; gnomAD: Genome Aggregation Database<sup>4</sup>; GERP: Genomic Evolutionary Rate Profiling<sup>5</sup>; CADD: Combined Annotation-Dependent Depletion<sup>6</sup>; PolyPhen-2: Polymorphism Phenotyping v2<sup>7</sup>; SIFT: Sorting Tolerant From Intolerant<sup>8</sup>. <sup>a</sup>Coordinates of DNA changes are based on the human genome reference sequence GRCh37/hg19. The nomenclature of nucleotide and amino acid changes is based on *RHOA* RefSeq accession number NM\_001664.2. <sup>b</sup>Presence in COSMIC (<http://cancer.sanger.ac.uk/>, accessed in November 2016). <sup>c</sup>Number of alleles found in ExAC (<http://exac.broadinstitute.org/>, accessed in November 2016) and gnomAD (<http://gnomad.broadinstitute.org/>, accessed in November 2016). <sup>d</sup>Among the two scores provided by PolyPhen-2 the HumVar-trained model is the most appropriate for Mendelian diseases.

**Supplementary Table 8.** Phenotype of patients with hypomelanosis of Ito in the M.U.S.T.A.R.D. cohort.

| Subject | <i>RHOA</i> 's related clinical manifestation |                        |                 |                 |                  |                 |                         | Other symptom                                             | Test              | Result                      |
|---------|-----------------------------------------------|------------------------|-----------------|-----------------|------------------|-----------------|-------------------------|-----------------------------------------------------------|-------------------|-----------------------------|
|         | Linear hypopigmentation                       | Craniofacial asymmetry | Acral anomalies | Teeth Anomalies | Ocular anomalies | Brain anomalies | Intellectual disability |                                                           |                   |                             |
| S1      | +                                             | +                      | +               | +               | +                | +               | -                       | -                                                         | WES               | <i>RHOA</i>                 |
| S2      | +                                             | +                      | +               | +               | +                | +               | -                       | Asymmetrical hearing loss                                 | WES               | <i>RHOA</i> and m.11778 G>A |
| S3      | +                                             | +                      | +               | +               | -                | +               | -                       | Skeletal and vesicoureteral anomalies                     | WES               | <i>RHOA</i>                 |
| S4      | +                                             | +                      | +               | +               | +                | +               | -                       | -                                                         | TUDS              | <i>RHOA</i>                 |
| S5      | +                                             | +                      | +               | +               | -                | -               | -                       | Sigmoid and rectal atresia                                | TUDS              | <i>RHOA</i>                 |
| S6      | +                                             | +                      | +               | +               | -                | NA              | -                       | -                                                         | TUDS              | -                           |
| S7      | +                                             | +                      | +               | +               | +                | NA              | -                       | Bilateral hearing loss, asymmetrical lower limbs          | Sanger Sequencing | <i>RHOA</i>                 |
| S8      | +                                             | +                      | +               | -               | -                | -               | -                       | Skeletal anomalies                                        | WES               | -                           |
| S9      | +                                             | -                      | -               | -               | +                | +               | +                       | Autism, Skeletal anomalies, seizure, spina bifida occulta | WES               | Other postzygotic cause     |
| S10     | +                                             | -                      | -               | -               | +                | -               | +                       | Atrial septal aneurysm, cryptorchidism                    | WES               | Other constitutional cause  |

|     |   |   |   |   |   |   |   |                                                                                                                   |     |                            |
|-----|---|---|---|---|---|---|---|-------------------------------------------------------------------------------------------------------------------|-----|----------------------------|
| S11 | + | - | + | - | + | + | + | Feeding difficulties, hypospadias, short stature, scoliosis, bilateral hearing loss, brachycephaly, hypertelorism | WES | Other postzygotic cause    |
| S12 | + | - | - | - | - | + | + | Autism, seizure                                                                                                   | WES | Other postzygotic cause    |
| S13 | + | - | - | - | - | - | + | Fronto-nasal dysplasia, epilepsy, lower limbs hypoplasia                                                          | WES | Other constitutional cause |
| S14 | + | - | + | - | - | - | + | Eczema, tongue protrusion                                                                                         | WES | -                          |
| S15 | + | - | - | - | - | - | - | Skeletal anomalies, ichtiosis                                                                                     | WES | Other postzygotic cause    |
| S16 | + | - | - | - | - | - | + | Autism, hypotonia, feeding difficulties, hand stereotypies                                                        | WES | Other constitutional cause |
| S17 | + | - | - | - | - | + | + | Low set hairline                                                                                                  | WES | Other postzygotic cause    |
| S18 | + | - | - | - | - | - | + | Ptosis, Kawasaki disease, encopresia                                                                              | WES | -                          |
| S19 | + | - | - | - | - | + | - | Movement disorder                                                                                                 | WES | Other postzygotic cause    |
| S20 | + | - | - | - | - | + | - | Scoliosis, kidney anomalies, leg length discrepancy                                                               | WES | -                          |
| S21 | + | - | - | - | - | + | - | Progressive peripheral neuropathy                                                                                 | WES | Other postzygotic cause    |
| S22 | + | - | - | - | + | - | + | Seizures, autism                                                                                                  | WES | -                          |
| S23 | + | - | - | - | - | + | - | Macrocephaly                                                                                                      | WES | -                          |
| S24 | + | - | + | - | - | - | + | Leg length discrepancy, scoliosis, delayed puberty, cardiac valvular dysplasia                                    | WES | Other postzygotic cause    |
| S25 | + | - | - | - | - | + | + | Obesity, synophris, blepharophimosis, ideomotor apraxia                                                           | WES | Other postzygotic cause    |

|     |   |   |   |   |    |    |   |                                            |      |                         |
|-----|---|---|---|---|----|----|---|--------------------------------------------|------|-------------------------|
| S26 | + | - | - | - | -  | -  | - | Focal epilepsy                             | WES  | Other postzygotic cause |
| S27 | + | - | - | - | -  | NA | + | Cryptorchidism, strabismus                 | TUDS | -                       |
| S28 | + | - | - | + | -  | NA | + | Microcephaly                               | TUDS | -                       |
| S29 | + | - | - | - | NA | +  | + | Feeding difficulties, atrial septal defect | TUDS | -                       |
| S30 |   |   |   |   |    |    |   | -                                          | TUDS | -                       |
| S31 | + | - | - | + | +  | -  | + | -                                          | TUDS | -                       |

---

**Supplementary Table 9.** Summary of the most frequent somatic mutations of *RHOA* reported in cancer.

| Amino-acid change | Samples in COSMIC | Cancer type (sample count)                                                     | Functional impact                                                                                                    |
|-------------------|-------------------|--------------------------------------------------------------------------------|----------------------------------------------------------------------------------------------------------------------|
| p.Gly17Val        | 152               | Lymphoid neoplasm (151), ovarian carcinoma (1)                                 | Dominant-negative <sup>9,10</sup>                                                                                    |
| p.Gly17Glu        | 35                | Lymphoid neoplasm (27), stomach carcinoma (6), breast carcinoma (2)            | Gain of function (growth-promoting effects) <sup>11</sup>                                                            |
| p.Tyr42Cys        | 21                | Stomach carcinoma (19), breast carcinoma (1), Large intestine carcinoma (1),   | Both gain <sup>11</sup> (growth-promoting effects) and loss of function <sup>12</sup> (defective signaling) reported |
| p.Cys16Arg        | 18                | Lymphoid neoplasm (18)                                                         | Gain of function (increased RhoA activity, faster GTP/GDP exchange) <sup>9</sup>                                     |
| p.Arg5Gln         | 13                | Lymphoid neoplasm (9), large intestine carcinoma (2), stomach carcinoma (2)    | Dominant negative and reduced RhoA activity <sup>13</sup>                                                            |
| p.Arg5Trp         | 10                | Stomach carcinoma (8), breast carcinoma (1), oesophagus carcinoma (1)          | Gain of function (growth-promoting effects) <sup>11</sup>                                                            |
| p.Leu57Val        | 9                 | Stomach carcinoma (9)                                                          | Loss of function (defective signaling) <sup>12</sup>                                                                 |
| p.Ala161Val       | 6                 | Lymphoid neoplasm (3), urinary tract carcinoma (2), pleural mesothelioma (1),  | Gain of function (increased RhoA activity, faster GTP/GDP exchange) <sup>9</sup>                                     |
| p.Tyr34Cys        | 5                 | Large intestine carcinoma (2), stomach carcinoma (2), oesophagus carcinoma (1) | No data available                                                                                                    |
| p.Leu69Arg        | 5                 | Stomach carcinoma (3), lymphoid neoplasm (2)                                   | Loss of function (predicted to diminish most RhoA-GEF interactions) <sup>14</sup>                                    |

Abbreviations: COSMIC: Catalogue of Somatic Mutations in Cancer<sup>2</sup>. Only mutations reported at least five times in COSMIC are shown (accessed in November 2016). The nomenclature of amino acid changes is based on *RHOA* RefSeq accession number NM\_001664.2.

**Supplementary Table 10. Primers used for mutagenesis.**

| Variant | Sequence                                                                           |
|---------|------------------------------------------------------------------------------------|
| E47K    | Forward: TATGTGGCAGATATCAAGGTGGATGGAAAG<br>Reverse: CTTTCCATCCACCTTGATATCTGCCACATA |
| P71S    | Forward: TGGGTAGGAGAGGGACCTCAGGCGATC<br>Reverse: GATCGCCTGAGGTCCCTCTCCTACCCA       |

## SUPPLEMENTARY REFERENCES

1. McKenna, A. *et al.* The Genome Analysis Toolkit: a MapReduce framework for analyzing next-generation DNA sequencing data. *Genome Res.* **20**, 1297–1303 (2010).
2. Forbes, S. A. *et al.* COSMIC: exploring the world's knowledge of somatic mutations in human cancer. *Nucleic Acids Res.* **43**, D805-811 (2015).
3. Lek, M. *et al.* Analysis of protein-coding genetic variation in 60,706 humans. *Nature* **536**, 285–291 (2016). Preprint <http://dx.doi.org/10.1101/531210>
4. Karczewski, K. *et al.*, Variation across 141,456 human exomes and genomes reveals the spectrum of loss-of-function intolerance across human protein-coding genes.
5. Cooper, G. M. *et al.* Single-nucleotide evolutionary constraint scores highlight disease-causing mutations. *Nat. Methods* **7**, 250–251 (2010).
6. Kircher, M. *et al.* A general framework for estimating the relative pathogenicity of human genetic variants. *Nat. Genet.* **46**, 310–315 (2014).
7. Adzhubei I, Jordan DM, Sunyaev SR. Predicting functional effect of human missense mutations using PolyPhen-2. *Curr Protoc Hum Genet.* 2013 Jan;Chapter 7:Unit7.20. doi: 10.1002/0471142905.hg0720s76
8. Kumar P, Henikoff S, Ng PC. Predicting the effects of coding non-synonymous variants on protein function using the SIFT algorithm. *Nat Protoc.* 2009;4(7):1073-8
9. Nagata, Y. *et al.* Variegated RHOA mutations in adult T-cell leukemia/lymphoma. *Blood* **127**, 596–604 (2016).
10. Sakata-Yanagimoto, M. *et al.* Somatic RHOA mutation in angioimmunoblastic T cell lymphoma. *Nat. Genet.* **46**, 171–175 (2014).
11. Kakiuchi, M. *et al.* Recurrent gain-of-function mutations of RHOA in diffuse-type gastric carcinoma. *Nat. Genet.* **46**, 583–587 (2014).
12. Wang, K. *et al.* Whole-genome sequencing and comprehensive molecular profiling identify new driver mutations in gastric cancer. *Nat. Genet.* **46**, 573–582 (2014).
13. O'Hayre, M. *et al.* Inactivating mutations in GNA13 and RHOA in Burkitt's lymphoma and diffuse large B-cell lymphoma: a tumor suppressor function for the Gα13/RhoA axis in B cells. *Oncogene* **35**, 3771–3780 (2016).
14. Rohde, M. *et al.* Recurrent RHOA mutations in pediatric Burkitt lymphoma treated according to the NHL-BFM protocols. *Genes. Chromosomes Cancer* **53**, 911–916 (2014).
